# Supplementary material
Source: publisher site journal article supplement (https://www.dovepress.com/article/supplementary_file/538581/538581%20Revised%20Supplementary%20Table%201.docx)
Supplement: Supplementary file 1 [file 538581%20Revised%20Supplementary%20Table%201.docx]

**Supplementary Table 1: Multivariable Linear Regression Adjusted Betas of Opioid Usage During Hospital Stay With and Without Inverse Probability of Treatment Weighting (N = 517)**

|  | Adjusted Linear Regression Model | | Adjusted Linear Regression Model  with IPTW | |
| --- | --- | --- | --- | --- |
| Characteristic | Adjusted Beta (95% CI) | p-value | Adjusted Beta (95% CI) | p-value |
| Age (10 year unit) | -4.96 (-8.00, -1.91) | <0.01 | -2.49 (-5.57, 0.59) | 0.11 |
| Race/Ethnicity | | | |  |
| Asian | -16.80 (-26.23, -7.37) | <0.01 | -5.38 (-14.15, 3.38) | 0.23 |
| Black | -18.45 (-33.13, - 3.77) | 0.01 | -16.04 (-32.55, 0.48) | 0.06 |
| Hispanic | 4.62 (-8.16, 17.40) | 0.48 | 13.54 (-0.28, 27.35) | 0.05 |
| Other | 9.69 (-7.37, 26.76) | 0.27 | 0.38 (-15.57, 16.34) | 0.96 |
| White | ref | ref | ref | ref |
| Gender | | | |  |
| Male | 0.53 (-25.82, 26.88) | 0.97 | -0.60 (-30.61, 29.40) | 0.97 |
| Female | ref | ref | ref | ref |
| BMI | |  |  |  |
| Normal | ref | ref | ref | ref |
| Overweight | 6.66 (-2.24, 15.57) | 0.14 | 5.39 (-3.77, 14.56) | 0.25 |
| Obese | 10.41 (1.20, 19.63) | 0.03 | 17.50 (8.04, 26.95) | <0.01 |
| ASA | |  |  |  |
| Score I-II | ref | ref | ref | ref |
| Score III-IV | 2.63 (-5.57, 10.83) | 0.53 | 9.39 (0.88, 17.90) | 0.03 |
| Type of Block | |  |  |  |
| PECS | ref | ref | ref | ref |
| ESP | -6.74 (-18.38, 4.89) | 0.26 | 0.67 (-7.34, 8.67) | 0.87 |
| Surgical Duration (10 min unit) | 2.37 (1.50, 3.24) | <0.01 | 1.89 (1.02, 2.76) | <0.01 |
| Surgery Type |  |  |  |  |
| Simple/Nipple-sparing | ref | ref | ref | ref |
| Radical/Modified Radical | 4.32 (-5.02, 13.66) | 0.37 | 13.09 (3.23, 22.95) | 0.01 |
| Axillary Lymph Node Dissection | -5.11 (-18.56, 8.33) | 0.46 | -2.95 (-17.63, 11.73) | 0.69 |
| Chronic Pain | 17.23 (6.15, 28.31) | <0.01 | 11.27 (-0.41, 22.96) | 0.06 |
| NSAID use | 26.77 (6.90, 46.64) | 0.01 | 52.18 (31.01, 73.35) | <0.01 |
| Acetaminophen use | 3.20 (-11.11, 17.51) | 0.66 | 1.69 (-14.72, 18.11) | 0.84 |
| Gabapentin use | -2.59 (-10.98, 5.80) | 0.55 | -3.94 (-12.43, 4.55) | 0.36 |
| Ketamine use | 1.67 (-8.83, 12.17) | 0.75 | 7.09 (-3.67, 17.85) | 0.20 |
| Alpha-2 Agonist use | -3.96 (-11.90, 3.97) | 0.33 | 2.85 (-5.00, 10.71) | 0.48 |
| Magnesium use | -1.36 (-14.22, 11.50) | 0.84 | -12.97 (-24.99, -0.96) | 0.03 |
| Corticosteroid use | 23.11 (14.30, 31.92) | <0.01 | 24.85 (15.42, 34.28) | <0.01 |

Abbreviations: IPTW, Inverse Probability of Treatment Weighting; BMI, body mass index; ASA, American Society of Anesthesiologist; PECS, pectoralis nerve; ESP, erector spinae plane; NSAID, nonsteroidal anti-inflammatory drugs.

**Supplemental Table 2. Block Trends in Mastectomy Surgery by Year (n = 517)**

| Year | Anesthesia Type | | |
| --- | --- | --- | --- |
| Total N = 517 (100%) | ESP n = 89 (17.2%) | PEC n = 428 (82.8%) |
| 2017 | 14 (2.7%) | 0 (0.0%) | 14 (100.0%) |
| 2018 | 105 (20.3%) | 6 (5.7%) | 99 (94.3%) |
| 2019 | 216 (41.8%) | 25 (11.6%) | 191 (88.4%) |
| 2020 | 182 (35.2%) | 58 (31.9%) | 124 (68.1%) |
